# Supplementary material for: The dysregulated Pink1- Drosophila mitochondrial proteome is partially corrected with exercise
Source: PubMed Central journal article supplement (PMC8221352; doi:10.18632/aging.203128), 2021-06-01
Supplement: aging-13-203128-s002.pdf [file aging-13-203128-s002.pdf]

SUPPLEMENTARY FIGURE

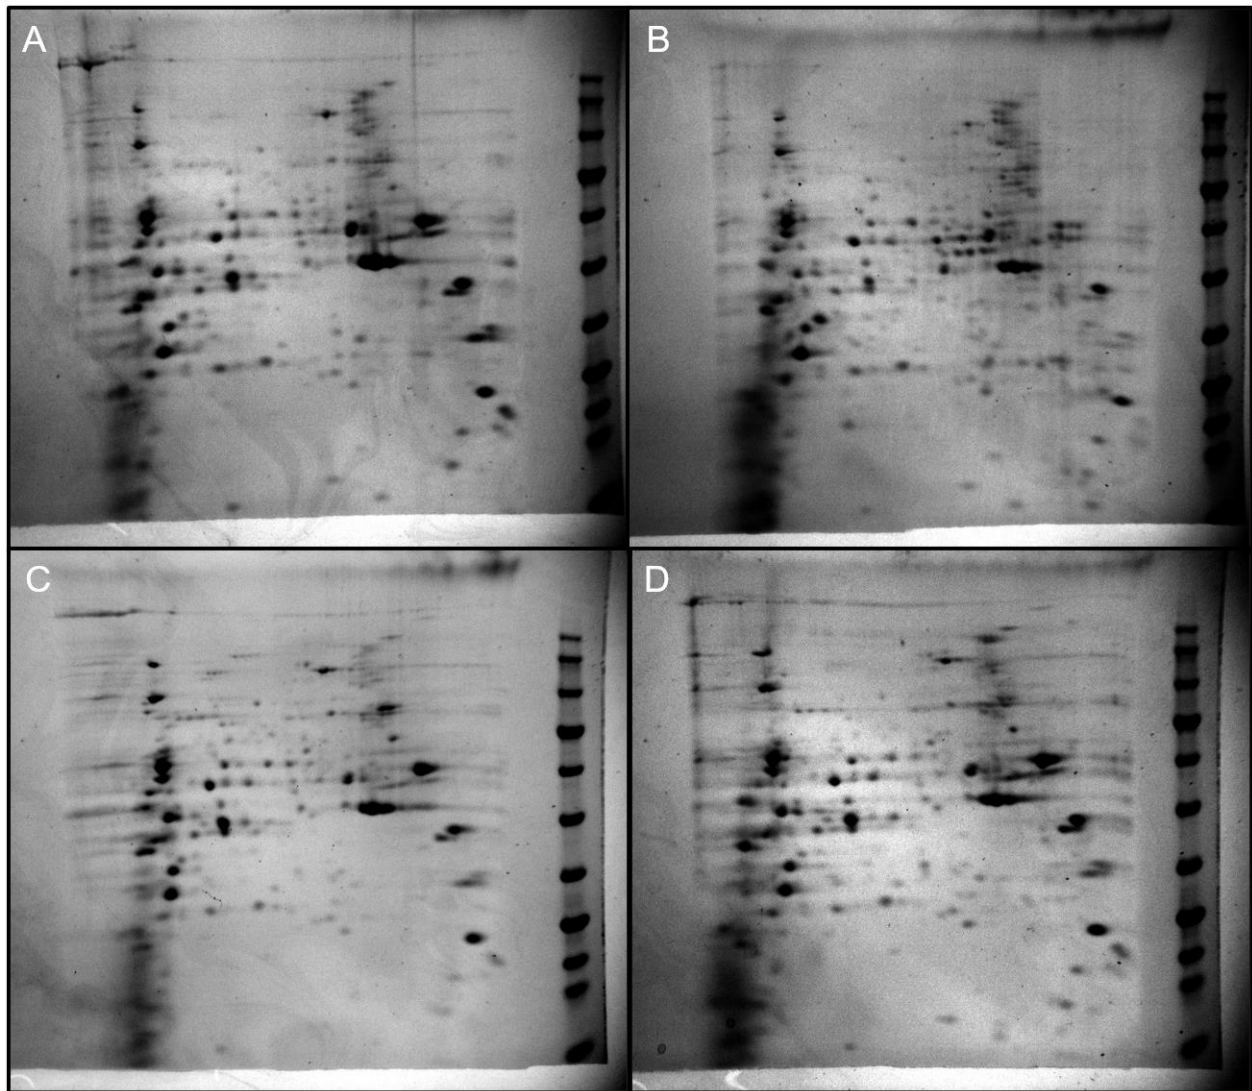

**Supplementary Figure 1.** Representative 2DE gels of (A) exercised Pink1, (B) non-exercised Pink1, (C) exercised wildtype, (D) non-exercised wildtype *Drosophila melanogaster*.
